# Supplementary material for: The Commensal Microbiota Enhances ADP-Triggered Integrin αIIbβ3 Activation and von Willebrand Factor-Mediated Platelet Deposition to Type I Collagen
Source: PubMed Central journal article supplement (PMC7583822; doi:10.3390/ijms21197171), 2020-09-28
Supplement: ijms-21-07171-s001.pdf [file ijms-21-07171-s001.pdf]

### Supplementary figure 1

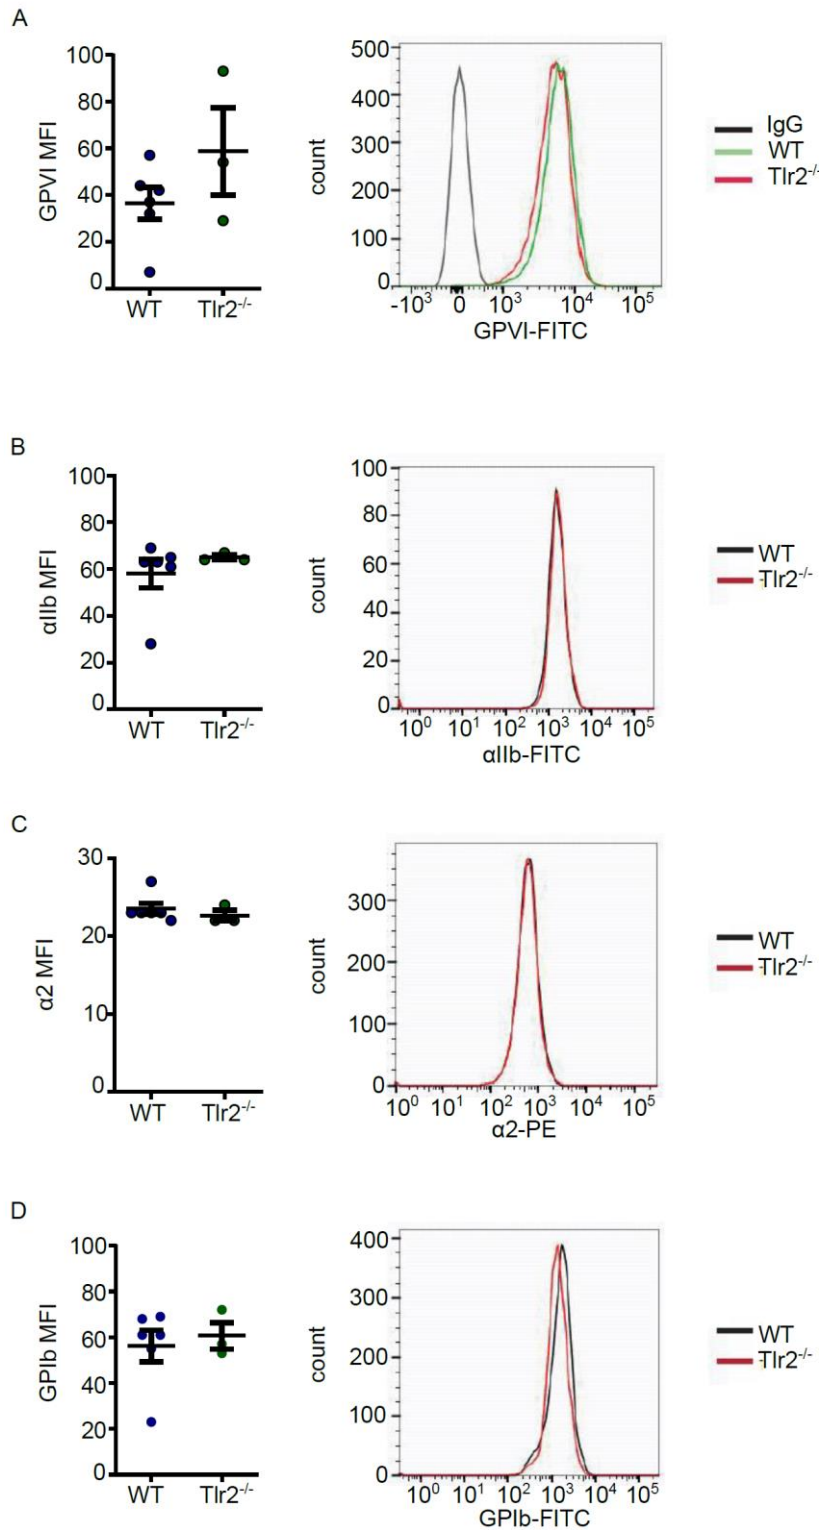

**Supplementary Figure 1:** Platelet surface receptor mean fluorescence intensity (MFI) and representative histograms of WT (n=5) and Tlr2<sup>-/-</sup> (n=3) mice quantified by flow cytometry. **(A)** GPVI **(B)**  $\alpha$ <sub>IIb</sub> **(C)**  $\alpha$ <sub>2</sub> and **(D)** GPIb. All data were expressed as means  $\pm$  SEM. Statistical comparisons were performed using the Student's
